# Supplementary material for: Do trauma type, stressful life events, and social support explain women veterans’ high prevalence of PTSD?
Source: Springer Nature journal article supplement (doi:10.1007/s00127-018-1550-x), 2018-06-23
Supplement: MOESM1 [file 15874678]

**Online Resource 1. Women Veteran Demographic Characteristics Across Data Sources.**

| **Variable, % unadjusted** | | **NESARC-III**  (n=379) | **National Survey of Women Veteransa**  (n=3,611) | **National Center for Veterans Analysis and Statisticsb**  (n=1,835,849) |
| --- | --- | --- | --- | --- |
| Age | 18-44 | 35.49 | 27.4 | 39.75 |
|  | 45-64 | 44.09 | 40.2 | 43.65 |
|  | ≥65 | 20.43 | 32.4 | 16.59 |
| Race/ethnicity | White, non-Hispanic | 73.70 | 76.8 | 65.62 |
|  | Black, non-Hispanic | 17.26 | 11.0 | 19.58 |
|  | Other, non-Hispanic | 2.50 | 7.5 | 8.4 |
|  | Hispanic, any race | 6.54 | 4.7 | 9.2 |
| Annual household income <$20,000 | | 13.63 | 10.6 | -- |
| Married/living with someone | | 58.96 | 57.7 | -- |

aWashington DL, Farmer MM, Mor SS, Canning M, Yano EM (2015) Assessment of the

healthcare needs and barriers to VA use experienced by women veterans: findings from the

national survey of women Veterans. Med Care 53(4 Suppl 1):S23-S31

bData from Population Tables September 2015, only available for age and race/ethnicity. <https://www.va.gov/vetdata/veteran_population.asp>

**Online Resource 2. Men Veteran Demographic Characteristics Across Data Sources.**

| **Variable, % unadjusted** | | **NESARC-III**  (n=2,740) | **National Center for Veterans Analysis and Statisticsa**  (n=18,947,705) |
| --- | --- | --- | --- |
| Age | 18-44 | 17.04 | 17.55 |
|  | 45-64 | 37.60 | 32.70 |
|  | ≥65 | 45.37 | 49.75 |
| Race/ethnicity | White, non-Hispanic | 80.17 | 78.30 |
|  | Black, non-Hispanic | 9.67 | 11.22 |
|  | Other, non-Hispanic | 3.67 | 5.51 |
|  | Hispanic, any race | 6.49 | 6.86 |
| Annual household income <$20,000 | | 15.15 | -- |
| Married/living with someone | | 68.56 | -- |

aData from Population Tables September 2015, only available for age and race/ethnicity. <https://www.va.gov/vetdata/veteran_population.asp>
